# Supplementary material
Source: publisher site journal article supplement (https://study.sagepub.com/sites/default/files/phillips_kelly_2e_appendix_1a.doc)
Supplement: Supplementary file 1 [file phillips_kelly_2e_appendix_1a.doc]

**Appendix 1(a)** Examples of Teacher-made Single Word Reading Tests

| **Single Word Reading Test: Primary Example**  This should only be used **after** the assessment of the first 100 words suggested in Letters and Sounds has been made. | | | | |
| --- | --- | --- | --- | --- |
| school | there | said | day | have |
| saw | people | one | what | good |
|  |  |  |  |  |
| right | door | key | still | want |
| please | thought | horse | come | would |
| cried | etc. |  |  |  |

| Single Word Reading Test: Secondary Example | | | | |
| --- | --- | --- | --- | --- |
| park | said | where | new | would |
| cold | any | every | took | other |
|  |  |  |  |  |
| print | soft | fine | shelter | thought |
| vain | planet | source | method | triangle |
|  |  |  |  |  |
| climate | record | present | asked | practice |
| answer | science | global | change | model |
|  |  |  |  |  |
| addition | recognise | system | experiment | etc. |

**Notes:** We suggest about 50 words (maximum).

Unless there is comparison across an age group, this information, while perhaps indicating how a learner fares when meeting these words, is of limited use diagnostically.

**Photocopiable**

*Assessment of Learners with Dyslexic-Type Difficulties* 2e © 2018 Sylvia Phillips and Kathleen Kelly (Sage: London).
